# Supplementary material for: Utility of Geostationary Lightning Mapper Derived Lightning NO x Emission Estimates in Air Quality Modeling Studies
Source: Copernicus journal article supplement (doi:10.5194/egusphere-2023-901), 2023-06-28
Supplement: Supplementary file 1 [file egusphere-2023-901-supplement.pdf]

# Supplement Materials

**Table S1: Ground-level MDA8 ozone statistics over the model domain and geographic regions for June 2019. Bold numbers indicate better performance for each case.**

| Region | Case  | Record | OBS [ppb] | MOD [ppb] | MB [ppb]   | NMB [%]    | RMSE [ppb] | NME [%]     | R           |
|--------|-------|--------|-----------|-----------|------------|------------|------------|-------------|-------------|
| Domain | CNTRL | 34151  | 46.1      | 47.5      | <b>1.4</b> | <b>3.0</b> | <b>8.5</b> | <b>14.2</b> | 0.72        |
|        | LGTNO | 34151  | 46.1      | 47.8      | 1.7        | 3.6        | 8.5        | <b>14.2</b> | <b>0.73</b> |
| NE     | CNTRL | 5358   | 43.9      | 47.8      | <b>3.9</b> | <b>8.9</b> | <b>8.3</b> | <b>14.8</b> | 0.72        |
|        | LGTNO | 5358   | 43.9      | 48.1      | 4.2        | 9.5        | 8.4        | 14.9        | <b>0.73</b> |
| SE     | CNTRL | 5871   | 41.4      | 44.2      | <b>2.8</b> | <b>6.8</b> | <b>8.1</b> | <b>15.7</b> | <b>0.79</b> |
|        | LGTNO | 5871   | 41.4      | 44.7      | 3.3        | 8.0        | 8.3        | 16.0        | <b>0.79</b> |
| UM     | CNTRL | 8370   | 46.1      | 45.7      | -0.4       | -0.8       | 7.5        | 12.8        | 0.65        |
|        | LGTNO | 8370   | 46.1      | 46.1      | <b>0.0</b> | <b>0.0</b> | <b>7.4</b> | <b>12.6</b> | <b>0.66</b> |
| LM     | CNTRL | 3319   | 42.8      | 43.8      | <b>1.0</b> | <b>2.2</b> | 9.6        | 17.2        | <b>0.73</b> |
|        | LGTNO | 3319   | 42.8      | 44.2      | 1.4        | 3.3        | <b>9.5</b> | <b>17.1</b> | <b>0.73</b> |
| RM     | CNTRL | 5868   | 53.1      | 54.5      | <b>1.4</b> | <b>2.6</b> | 8.6        | 11.9        | 0.49        |
|        | LGTNO | 5868   | 53.1      | 54.7      | 1.6        | 3.0        | <b>8.5</b> | <b>11.8</b> | <b>0.50</b> |
| PC     | CNTRL | 5342   | 48.1      | 48.4      | <b>0.2</b> | <b>0.5</b> | 9.7        | 15.7        | <b>0.74</b> |
|        | LGTNO | 5342   | 48.1      | 48.4      | 0.3        | 0.6        | <b>9.7</b> | <b>15.6</b> | <b>0.74</b> |

5

**Table S2: Ground-level MDA8 ozone statistics over the model domain and geographic regions for July 2019. Bold numbers indicate better performance for each case.**

| Region | Case  | Record | OBS [ppb] | MOD [ppb] | MB [ppb]    | NMB [%]     | RMSE [ppb]  | NME [%]     | R           |
|--------|-------|--------|-----------|-----------|-------------|-------------|-------------|-------------|-------------|
| Domain | CNTRL | 35188  | 44.6      | 45.6      | <b>1.0</b>  | <b>2.2</b>  | <b>8.3</b>  | <b>14.4</b> | <b>0.75</b> |
|        | LGTNO | 35188  | 44.6      | 46.1      | 1.4         | 3.2         | 8.4         | 14.5        | <b>0.75</b> |
| NE     | CNTRL | 5462   | 45.6      | 48.4      | <b>2.8</b>  | <b>6.2</b>  | <b>8.2</b>  | <b>13.9</b> | <b>0.78</b> |
|        | LGTNO | 5462   | 45.6      | 48.8      | 3.2         | 7.1         | 8.4         | 14.3        | 0.77        |
| SE     | CNTRL | 5975   | 39.9      | 44.1      | <b>4.2</b>  | <b>10.4</b> | <b>8.0</b>  | <b>15.9</b> | <b>0.77</b> |
|        | LGTNO | 5975   | 39.9      | 44.9      | 5.0         | 12.4        | 8.4         | 16.8        | <b>0.77</b> |
| UM     | CNTRL | 8618   | 44.6      | 44.8      | <b>0.3</b>  | <b>0.6</b>  | <b>7.2</b>  | <b>12.7</b> | <b>0.72</b> |
|        | LGTNO | 8618   | 44.6      | 45.3      | 0.7         | 1.5         | 7.2         | <b>12.7</b> | <b>0.72</b> |
| LM     | CNTRL | 3542   | 38.3      | 42.4      | <b>4.1</b>  | <b>10.6</b> | <b>8.2</b>  | <b>17.3</b> | 0.82        |
|        | LGTNO | 3542   | 38.3      | 42.8      | 4.5         | 11.6        | 8.3         | 17.6        | <b>0.83</b> |
| RM     | CNTRL | 6009   | 50.2      | 48.6      | -1.6        | -3.2        | 8.1         | 12.2        | 0.55        |
|        | LGTNO | 6009   | 50.2      | 49.1      | <b>-1.1</b> | <b>-2.2</b> | <b>7.8</b>  | <b>11.8</b> | <b>0.57</b> |
| PC     | CNTRL | 5552   | 46.8      | 44.7      | -2.2        | -4.7        | <b>10.5</b> | <b>17.0</b> | <b>0.80</b> |
|        | LGTNO | 5552   | 46.8      | 44.7      | <b>-2.1</b> | <b>-4.6</b> | <b>10.5</b> | <b>17.0</b> | <b>0.80</b> |

**Table S3: Ground-level MDA8 ozone statistics over the model domain and geographic regions for September 2019. Bold numbers indicate better performance for each case.**

| Region | Case  | Record | OBS [ppb] | MOD [ppb] | MB [ppb]   | NMB [%]    | RMSE [ppb] | NME [%]     | R           |
|--------|-------|--------|-----------|-----------|------------|------------|------------|-------------|-------------|
| Domain | CNTRL | 33872  | 42.8      | 44.3      | <b>1.6</b> | <b>3.6</b> | 7.5        | 13.7        | 0.77        |
|        | LGTNO | 33872  | 42.8      | 44.6      | 1.8        | 4.2        | <b>7.5</b> | <b>13.6</b> | <b>0.78</b> |
| NE     | CNTRL | 5263   | 39.6      | 42.9      | <b>3.3</b> | <b>8.3</b> | <b>7.6</b> | <b>15.4</b> | 0.79        |
|        | LGTNO | 5263   | 39.6      | 42.9      | 3.4        | 8.5        | 7.6        | 15.5        | <b>0.80</b> |
| SE     | CNTRL | 5706   | 45.1      | 46.0      | <b>0.9</b> | <b>2.1</b> | 6.7        | <b>11.3</b> | 0.75        |
|        | LGTNO | 5706   | 45.1      | 46.3      | 1.2        | 2.6        | <b>6.6</b> | <b>11.3</b> | <b>0.76</b> |
| UM     | CNTRL | 8488   | 40.0      | 41.1      | <b>1.1</b> | <b>2.8</b> | <b>6.4</b> | <b>12.7</b> | <b>0.81</b> |
|        | LGTNO | 8488   | 40.0      | 41.3      | 1.3        | 3.2        | <b>6.4</b> | <b>12.7</b> | <b>0.81</b> |
| LM     | CNTRL | 3341   | 42.9      | 44.0      | <b>1.1</b> | <b>2.6</b> | 7.5        | 14.0        | 0.74        |
|        | LGTNO | 3341   | 42.9      | 44.5      | 1.5        | 3.6        | <b>7.5</b> | <b>13.9</b> | <b>0.75</b> |
| RM     | CNTRL | 5835   | 45.6      | 47.4      | <b>1.8</b> | <b>3.9</b> | 7.7        | 13.3        | 0.70        |
|        | LGTNO | 5835   | 45.6      | 47.8      | 2.2        | 4.9        | <b>7.5</b> | <b>13.0</b> | <b>0.72</b> |
| PC     | CNTRL | 5211   | 44.6      | 45.8      | <b>1.2</b> | <b>2.8</b> | 9.6        | 16.7        | <b>0.77</b> |
|        | LGTNO | 5211   | 44.6      | 45.9      | 1.4        | 3.0        | <b>9.5</b> | <b>16.6</b> | <b>0.77</b> |

15 **Table S4: Ground-level daily mean NO<sub>x</sub> statistics over the model domain and geographic regions for June 2019. Bold numbers indicate better performance for each case.**

| Region | Case  | Record | OBS [ppb] | MOD [ppb] | MB [ppb]     | NMB [%]       | RMSE [ppb]  | NME [%]      | R           |
|--------|-------|--------|-----------|-----------|--------------|---------------|-------------|--------------|-------------|
| Domain | CNTRL | 10650  | 7.94      | 6.75      | <b>-1.19</b> | <b>-14.90</b> | <b>7.64</b> | <b>55.30</b> | <b>0.54</b> |
|        | LGTNO | 10650  | 7.94      | 6.75      | <b>-1.19</b> | <b>-14.90</b> | <b>7.64</b> | <b>55.30</b> | <b>0.54</b> |
| NE     | CNTRL | 1580   | 10.18     | 8.27      | <b>-1.92</b> | <b>-18.80</b> | <b>9.27</b> | <b>55.50</b> | <b>0.50</b> |
|        | LGTNO | 1580   | 10.18     | 8.27      | <b>-1.92</b> | <b>-18.80</b> | <b>9.27</b> | <b>55.50</b> | <b>0.50</b> |
| SE     | CNTRL | 1081   | 10.06     | 6.93      | <b>-3.12</b> | <b>-31.10</b> | <b>8.55</b> | <b>51.30</b> | <b>0.57</b> |
|        | LGTNO | 1081   | 10.06     | 6.93      | -3.13        | <b>-31.10</b> | <b>8.55</b> | <b>51.30</b> | <b>0.57</b> |
| UM     | CNTRL | 1173   | 10.12     | 7.45      | <b>-2.67</b> | <b>-26.40</b> | <b>7.77</b> | <b>46.20</b> | <b>0.56</b> |
|        | LGTNO | 1173   | 10.12     | 7.45      | <b>-2.67</b> | <b>-26.40</b> | <b>7.77</b> | <b>46.20</b> | <b>0.56</b> |
| LM     | CNTRL | 1618   | 6.93      | 7.01      | 0.08         | 1.11          | <b>6.92</b> | <b>58.70</b> | <b>0.46</b> |
|        | LGTNO | 1618   | 6.93      | 7.01      | <b>0.08</b>  | <b>1.10</b>   | <b>6.92</b> | <b>58.70</b> | <b>0.46</b> |
| RM     | CNTRL | 2552   | 4.30      | 4.03      | -0.27        | -6.32         | <b>4.24</b> | <b>53.40</b> | <b>0.74</b> |
|        | LGTNO | 2552   | 4.30      | 4.03      | <b>-0.27</b> | <b>-6.28</b>  | <b>4.24</b> | <b>53.40</b> | <b>0.74</b> |
| PC     | CNTRL | 2646   | 8.89      | 7.94      | <b>-0.95</b> | <b>-10.70</b> | <b>8.97</b> | <b>60.80</b> | <b>0.41</b> |
|        | LGTNO | 2646   | 8.89      | 7.94      | -0.95        | <b>-10.70</b> | <b>8.97</b> | <b>60.80</b> | <b>0.41</b> |

**Table S5: Ground-level daily mean NO<sub>x</sub> statistics over the model domain and geographic regions for July 2019. Bold numbers indicate better performance for each case.**

| Region | Case  | Record | OBS [ppb] | MOD [ppb] | MB [ppb]     | NMB [%]       | RMSE [ppb]  | NME [%]      | R           |
|--------|-------|--------|-----------|-----------|--------------|---------------|-------------|--------------|-------------|
| Domain | CNTRL | 10790  | 7.87      | 7.15      | <b>-0.72</b> | <b>-9.16</b>  | <b>7.68</b> | <b>56.20</b> | <b>0.54</b> |
|        | LGTNO | 10790  | 7.87      | 7.15      | -0.72        | -9.18         | <b>7.68</b> | <b>56.20</b> | <b>0.54</b> |
| NE     | CNTRL | 1540   | 10.04     | 9.35      | <b>-0.70</b> | <b>-6.94</b>  | <b>8.91</b> | <b>57.60</b> | <b>0.50</b> |
|        | LGTNO | 1540   | 10.04     | 9.34      | -0.70        | -6.98         | <b>8.91</b> | <b>57.60</b> | <b>0.50</b> |
| SE     | CNTRL | 1064   | 10.18     | 7.74      | <b>-2.44</b> | <b>-24.00</b> | <b>8.19</b> | <b>50.50</b> | <b>0.54</b> |
|        | LGTNO | 1064   | 10.18     | 7.73      | -2.45        | -24.10        | <b>8.19</b> | <b>50.50</b> | <b>0.54</b> |
| UM     | CNTRL | 1191   | 9.53      | 7.25      | <b>-2.28</b> | <b>-24.00</b> | <b>7.40</b> | <b>45.70</b> | <b>0.56</b> |
|        | LGTNO | 1191   | 9.53      | 7.25      | -2.29        | <b>-24.00</b> | <b>7.40</b> | <b>45.70</b> | <b>0.56</b> |
| LM     | CNTRL | 1633   | 6.05      | 7.05      | 1.00         | 16.60         | 6.83        | <b>66.20</b> | <b>0.43</b> |
|        | LGTNO | 1633   | 6.05      | 7.05      | <b>1.00</b>  | <b>16.50</b>  | <b>6.82</b> | <b>66.20</b> | <b>0.43</b> |
| RM     | CNTRL | 2631   | 4.23      | 3.86      | -0.37        | -8.72         | <b>3.87</b> | <b>51.20</b> | <b>0.77</b> |
|        | LGTNO | 2631   | 4.23      | 3.86      | <b>-0.37</b> | <b>-8.67</b>  | <b>3.87</b> | <b>51.20</b> | <b>0.77</b> |
| PC     | CNTRL | 2755   | 9.54      | 8.79      | <b>-0.75</b> | <b>-7.83</b>  | <b>9.75</b> | <b>60.50</b> | <b>0.45</b> |
|        | LGTNO | 2755   | 9.54      | 8.79      | <b>-0.75</b> | <b>-7.83</b>  | <b>9.75</b> | <b>60.50</b> | <b>0.45</b> |

**Table S6: Ground-level daily mean NO<sub>x</sub> statistics over the model domain and geographic regions for September 2019. Bold numbers indicate better performance for each case.**

| Region | Case  | Record | OBS [ppb] | MOD [ppb] | MB [ppb]     | NMB [%]       | RMSE [ppb]   | NME [%]      | R           |
|--------|-------|--------|-----------|-----------|--------------|---------------|--------------|--------------|-------------|
| Domain | CNTRL | 10545  | 9.21      | 7.99      | <b>-1.22</b> | <b>-13.20</b> | <b>8.61</b>  | <b>53.60</b> | <b>0.57</b> |
|        | LGTNO | 10545  | 9.21      | 7.99      | <b>-1.22</b> | <b>-13.20</b> | <b>8.61</b>  | <b>53.60</b> | <b>0.57</b> |
| NE     | CNTRL | 1552   | 11.14     | 10.20     | <b>-0.94</b> | <b>-8.44</b>  | <b>9.74</b>  | <b>56.20</b> | <b>0.51</b> |
|        | LGTNO | 1552   | 11.14     | 10.20     | <b>-0.94</b> | <b>-8.44</b>  | <b>9.74</b>  | <b>56.20</b> | <b>0.51</b> |
| SE     | CNTRL | 1012   | 11.42     | 7.87      | <b>-3.55</b> | <b>-31.10</b> | <b>9.78</b>  | <b>52.40</b> | <b>0.61</b> |
|        | LGTNO | 1012   | 11.42     | 7.86      | <b>-3.55</b> | <b>-31.10</b> | <b>9.78</b>  | <b>52.40</b> | <b>0.61</b> |
| UM     | CNTRL | 1153   | 11.04     | 8.86      | <b>-2.18</b> | <b>-19.80</b> | <b>8.59</b>  | <b>45.50</b> | <b>0.57</b> |
|        | LGTNO | 1153   | 11.04     | 8.85      | <b>-2.18</b> | <b>-19.80</b> | <b>8.59</b>  | <b>45.50</b> | <b>0.57</b> |
| LM     | CNTRL | 1708   | 7.27      | 8.76      | <b>1.49</b>  | 20.50         | <b>7.34</b>  | <b>62.40</b> | <b>0.51</b> |
|        | LGTNO | 1708   | 7.27      | 8.76      | <b>1.49</b>  | <b>20.40</b>  | <b>7.34</b>  | <b>62.40</b> | <b>0.51</b> |
| RM     | CNTRL | 2591   | 5.14      | 4.38      | -0.77        | <b>-14.90</b> | <b>5.86</b>  | <b>51.70</b> | <b>0.72</b> |
|        | LGTNO | 2591   | 5.14      | 4.38      | <b>-0.77</b> | <b>-14.90</b> | <b>5.86</b>  | <b>51.70</b> | <b>0.72</b> |
| PC     | CNTRL | 2569   | 11.61     | 9.37      | <b>-2.24</b> | <b>-19.30</b> | <b>10.20</b> | <b>53.20</b> | <b>0.53</b> |
|        | LGTNO | 2569   | 11.61     | 9.37      | <b>-2.24</b> | <b>-19.30</b> | <b>10.20</b> | <b>53.20</b> | <b>0.53</b> |

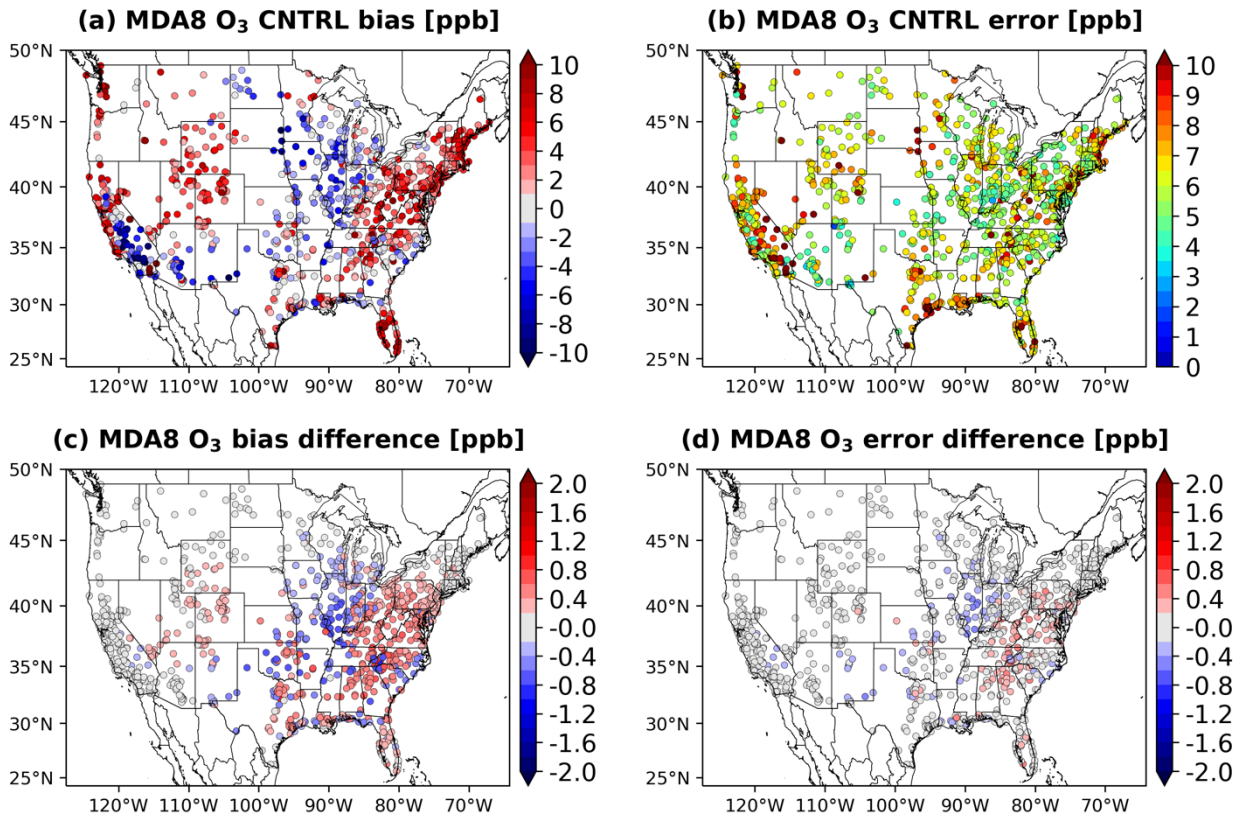

Figure S1: Spatial distribution of ground-level MDA8 ozone statistics for June 2019. (a) Mean bias of the CNTRL; (b) mean error of the CNTRL; (c) absolute mean bias difference between the LGTNO and the CNTRL; (d) mean error difference between the LGTNO and the CNTRL. In (c) and (d), negative and positive values represent improved and degraded statistics when including the NO<sub>x</sub> emission, respectively.

30



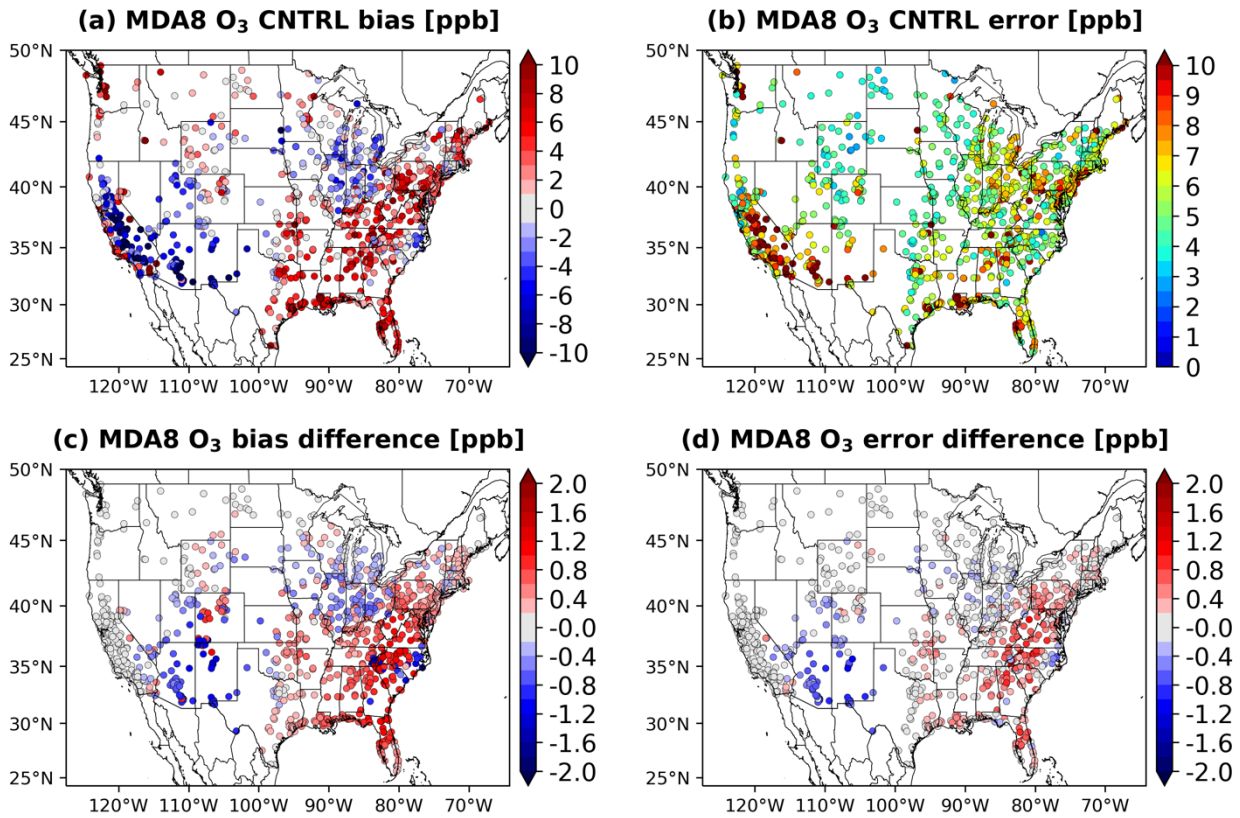

35 **Figure S2: Spatial distribution of ground-level MDA8 ozone statistics for July 2019. (a) Mean bias of the CNTRL; (b) mean error of the CNTRL; (c) absolute mean bias difference between the LGTNO and the CNTRL; (d) mean error difference between the LGTNO and the CNTRL. In (c) and (d), negative and positive values represent improved and degraded statistics when including the NO<sub>x</sub> emission, respectively.**

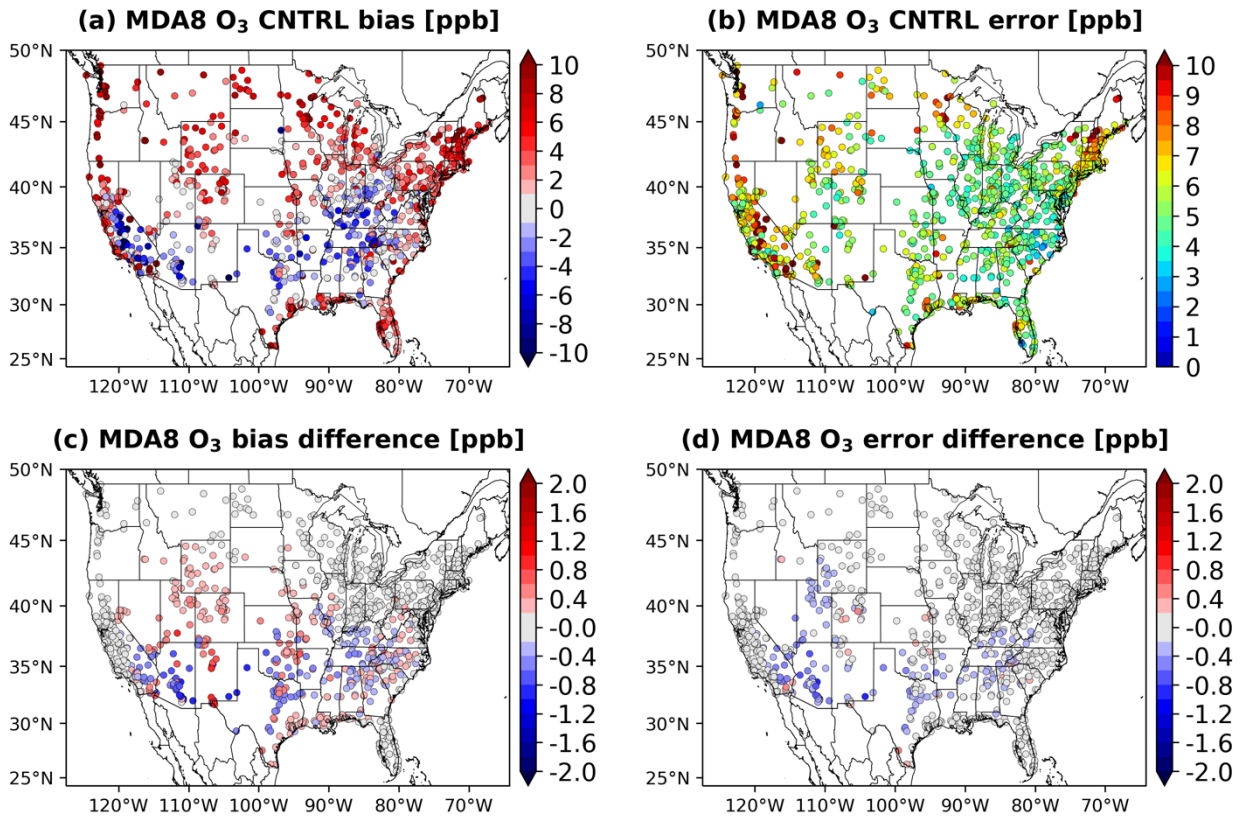

40

**Figure S3: Spatial distribution of ground-level MDA8 ozone statistics for September 2019. (a) Mean bias of the CNTRL; (b) mean error of the CNTRL; (c) absolute mean bias difference between the LGTNO and the CNTRL; (d) mean error difference between the LGTNO and the CNTRL. In (c) and (d), negative and positive values represent improved and degraded statistics when including the NO<sub>x</sub> emission, respectively.**

45

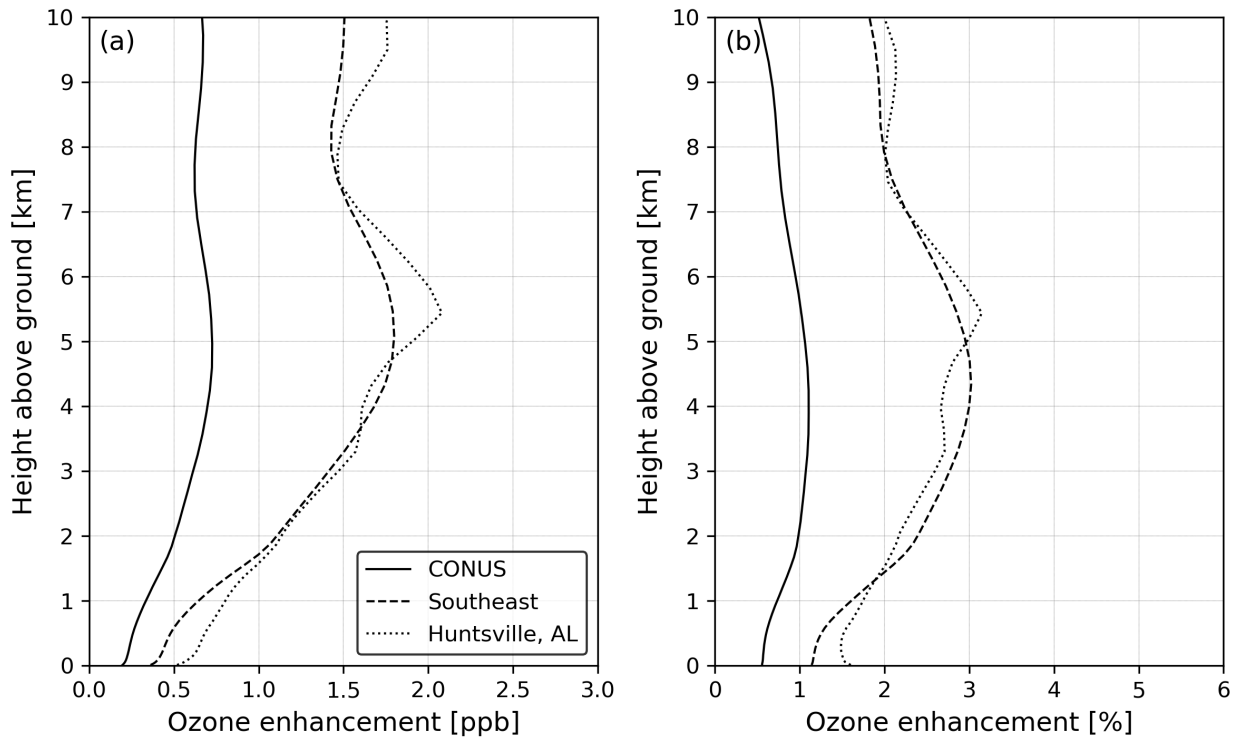

Figure S4: Vertical distribution of average ozone enhancement due to lightning  $\text{NO}_x$  emission during June 2019 for the CONUS, the southeast U.S. (arbitrarily selected 25–40°N, 75–95°W for computation), and Huntsville, AL. (a) Ozone enhancement in ppb; (b) ozone enhancement in percent.

50

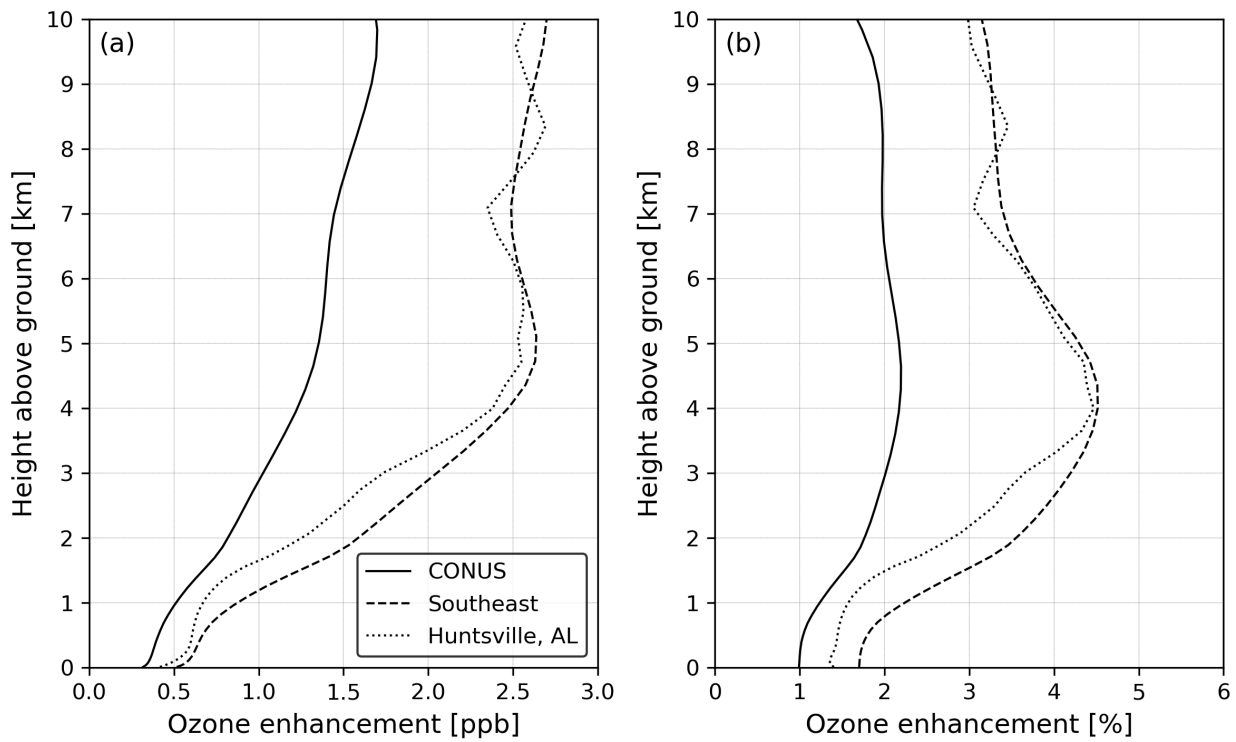

55 **Figure S5: Vertical distribution of average ozone enhancement due to lightning  $\text{NO}_x$  emission during July 2019 for the CONUS, the southeast U.S. (arbitrarily selected 25–40°N, 75–95°W for computation), and Huntsville, AL. (a) Ozone enhancement in ppb; (b) ozone enhancement in percent.**

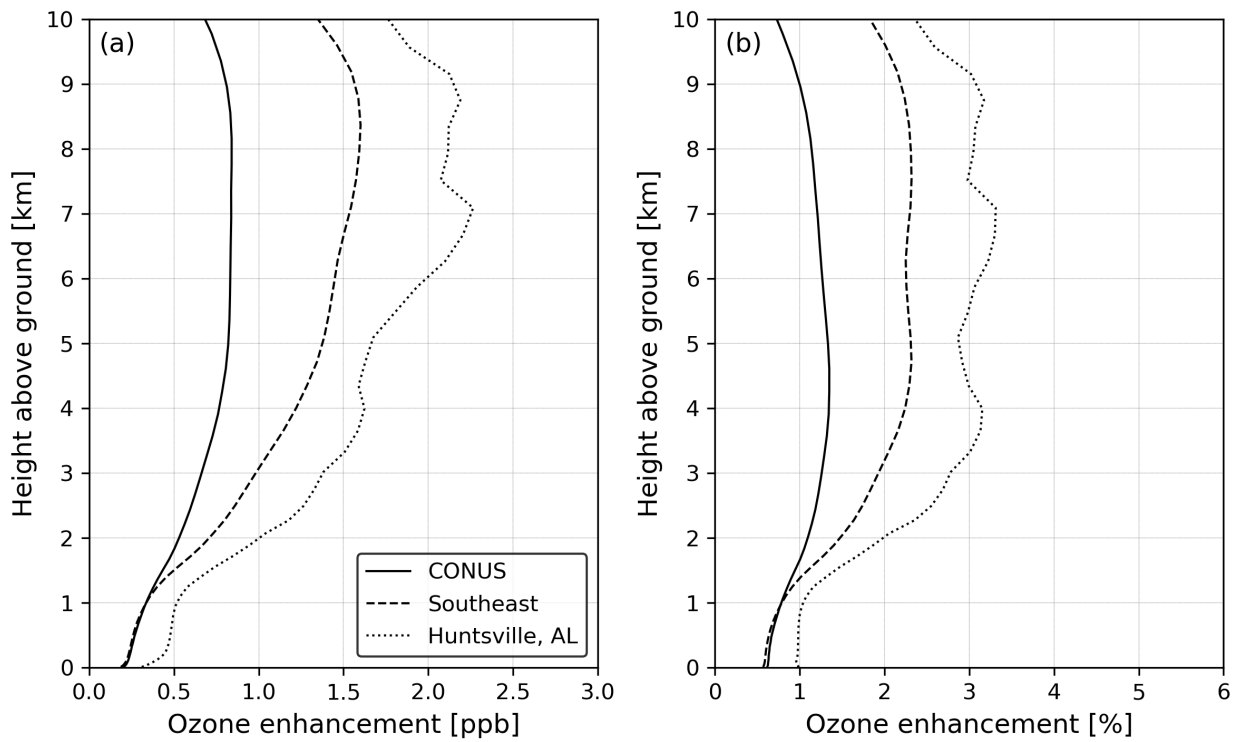

60 **Figure S6: Vertical distribution of average ozone enhancement due to lightning  $\text{NO}_x$  emission during September 2019 for the CONUS, the southeast U.S. (arbitrarily selected 25–40°N, 75–95°W for computation), and Huntsville, AL. (a) Ozone enhancement in ppb; (b) ozone enhancement in percent.**

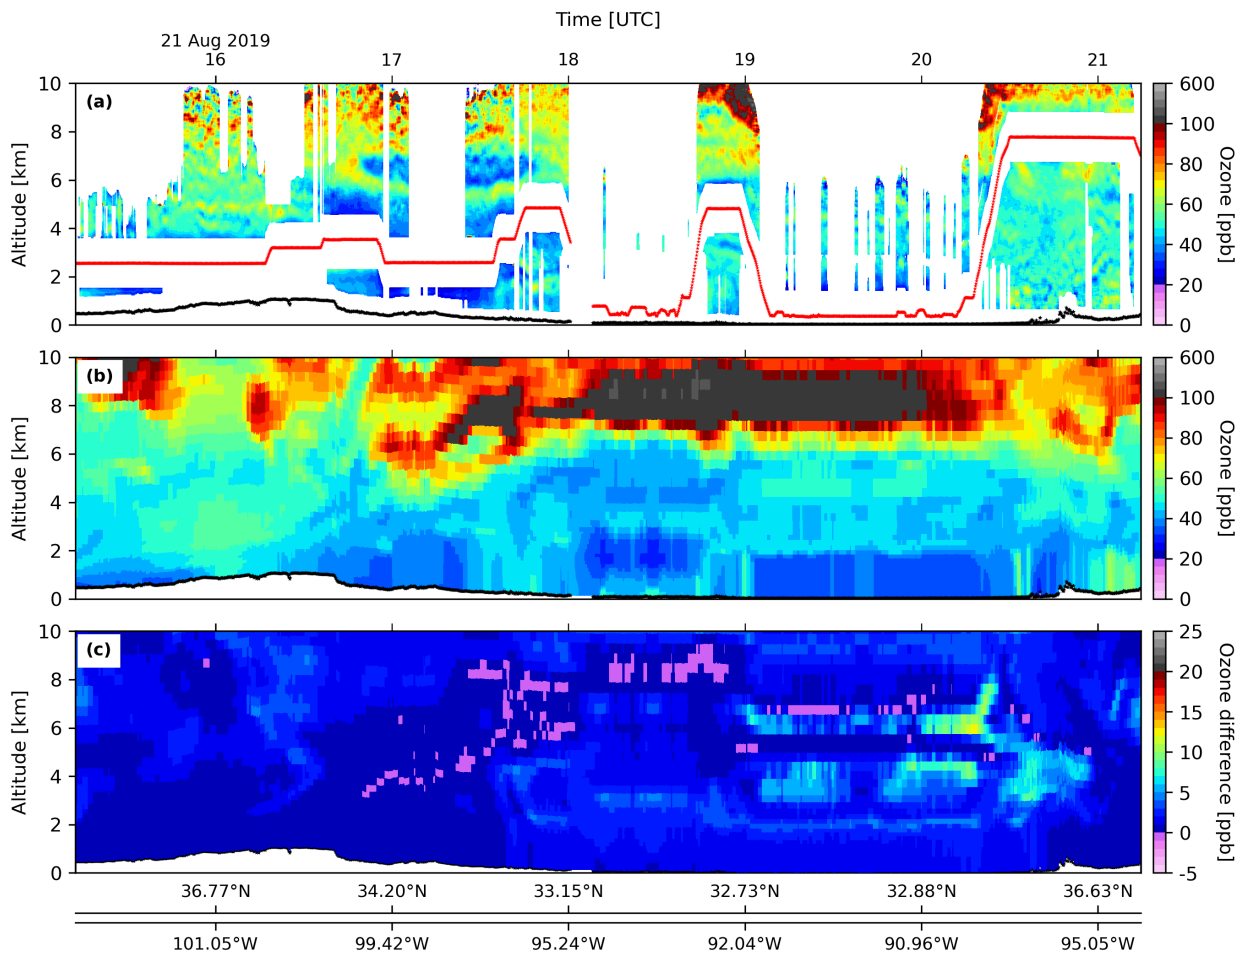

65

**Figure S7: Time-height cross sections of lidar-measured and model-simulated ozone mixing ratio along the FIREX-AQ flight track on 21 August 2019. (a) Lidar-measured ozone profiles; (b) simulated ozone mixing ratio by the CNTRL model run; (c) ozone difference between the LGTNO and the CNTRL.**

70



**Figure S8:** Time-height cross sections of lidar-measured and model-simulated ozone mixing ratio along the FIREX-AQ flight track on 23 August 2019. (a) Lidar-measured ozone profiles; (b) simulated ozone mixing ratio by the CNTRL model run; (c) ozone difference between the LGTNO and the CNTRL.



80 **Figure S9:** Time-height cross sections of lidar-measured and model-simulated ozone mixing ratio along the FIREX-AQ flight track on 26 August 2019. (a) Lidar-measured ozone profiles; (b) simulated ozone mixing ratio by the CNTRL model run; (c) ozone difference between the LGTNO and the CNTRL.
